# Supplementary material for: Cloning and Characterization of Low-Molecular-Weight Glutenin Subunit Alleles from Chinese Wheat Landraces (Triticum aestivumL.)
Source: Hindawi journal article supplement (doi:10.1155/2014/371045), 2014-01-01
Supplement: f1 [file 371045.f1.pdf]

Supplementary Data

|           |                                                       |     |
|-----------|-------------------------------------------------------|-----|
| Glu-A3-1a | .....                                                 | 0   |
| Glu-A3-1b | .....                                                 | 0   |
| Glu-B3-1a | .....                                                 | 0   |
| Glu-B3-1b | .....                                                 | 0   |
| Glu-B3-1c | .....                                                 | 0   |
| Glu-D3-1a | gtcaccgctgcatcgacatatccatcgactaaacaacggtgacccaattatat | 53  |
| Glu-D3-1b | gtcaccgctgcatcgacatatccatcgactaaacaacggtgacccaattatat | 53  |
| Glu-D3-1c | gtcaccgctgcatcgacatatccatcgactaaacaacggtgacccaattatat | 53  |
|           |                                                       |     |
| Glu-A3-1a | .....GATGCCAACGCCTA                                   | 14  |
| Glu-A3-1b | .....                                                 | 14  |
| Glu-B3-1a | .....gtaggcaccaactcc-g-----t--tg-                     | 29  |
| Glu-B3-1b | .....gtaggcaccaactcc-g-----t--tg-                     | 29  |
| Glu-B3-1c | .....gtaggcaccaactcc-g-----t--tg-                     | 29  |
| Glu-D3-1a | attactagagatctttccttatcagtaggcaccaactcc-g-----g-      | 106 |
| Glu-D3-1b | attactagagatctttccttatcagtaggcaccaactcc-g-----g-      | 106 |
| Glu-D3-1c | attactagagatctttccttatcagtaggcaccaactcc-g-----t-g-    | 106 |
|           |                                                       |     |
| Glu-A3-1a | ATGGCACACTGGTGGTGGCGCTGTACAACGGCACATTGACACTGCACATCGTT | 67  |
| Glu-A3-1b | -----a-----                                           | 67  |
| Glu-B3-1a | -----t-a-a-----c-a-----g-----c-----                   | 82  |
| Glu-B3-1b | ---a--t-a-a-----c-a-----g-----c-----                  | 82  |
| Glu-B3-1c | -----t-a-a-----c-a-----g-----c-----                   | 82  |
| Glu-D3-1a | -----a-----tt-----a-----                              | 159 |
| Glu-D3-1b | -----a-----tt-----a-----                              | 159 |
| Glu-D3-1c | -----a-----tt-----a-----                              | 159 |
|           |                                                       |     |
| Glu-A3-1a | GGCAAGGTACGGAGTGCAATGGAAGTCACCGCCTCAAGGTGAGCTATCTGGTG | 120 |
| Glu-A3-1b | -----                                                 | 120 |
| Glu-B3-1a | -----a-----t-a-----t---a-----                         | 135 |
| Glu-B3-1b | -----t-a-----t---a-----                               | 135 |
| Glu-B3-1c | -----t-a-----t---a-----                               | 135 |
| Glu-D3-1a | ---g-a-----c-----t-a-----c-----                       | 212 |
| Glu-D3-1b | ---g-a-----c-----t-a-----c-----                       | 212 |
| Glu-D3-1c | ---g-a-----c-----t-a-----c-----                       | 212 |
|           |                                                       |     |
| Glu-A3-1a | TGGCTGCAAAAAGGTACCCTGTAGTACCTGTTGTTGTTGTTGTTGAGGCTGTT | 173 |
| Glu-A3-1b | -----                                                 | 173 |
| Glu-B3-1a | -----g--ta-----g--t-----ag-c--ct-accca                | 188 |
| Glu-B3-1b | -----g--ta-----g--t-----ag-c--ct-accca                | 188 |
| Glu-B3-1c | -----g--ta-----g--t-----ag-c--ct-accca                | 188 |
| Glu-D3-1a | -----gcc-at-----ag-----                               | 257 |

|           |                                                        |     |
|-----------|--------------------------------------------------------|-----|
| Glu-D3-1b | -----gcc-at-----ag-----.....                           | 257 |
| Glu-D3-1c | -----cc-at-----ag-----.....                            | 257 |
| Glu-A3-1a | GACCCAGTTGCTGTTGAGGTTGTTGGAAAGAACATTGTCCGAG.....CTGC   | 220 |
| Glu-A3-1b | -----.....----                                         | 220 |
| Glu-B3-1a | attggtt--a-t-----c-----ttgctg----                      | 241 |
| Glu-B3-1b | attggtt--a-t-----c-----ttgctg----                      | 241 |
| Glu-B3-1c | attggtt--a-t-----c-----ttgctg----                      | 241 |
| Glu-D3-1a | .....---c-----.....t---                                | 270 |
| Glu-D3-1b | .....---c-----.....t---                                | 270 |
| Glu-D3-1c | .....---c-----.....t---                                | 270 |
| Glu-A3-1a | TGCTGCGACTGCTGTTGGGATTGGGAGACACCTTGACCTGACTGTTGGGGTTG  | 273 |
| Glu-A3-1b | -----                                                  | 273 |
| Glu-B3-1a | -----tg-----g--c-----                                  | 294 |
| Glu-B3-1b | -----tg-----g--c-----                                  | 294 |
| Glu-B3-1c | -----tg-----g--c-----                                  | 294 |
| Glu-D3-1a | -----g-----a--a--g--ca-----                            | 323 |
| Glu-D3-1b | -----g-----a--a--g--ca-----                            | 323 |
| Glu-D3-1c | -----g-----a--a--g--ca-----                            | 323 |
| Glu-A3-1a | TTGCTGCTGAGGTTGGACAAAGCCCTG.....TTGTTGTTCTTGCAGGATGA   | 320 |
| Glu-A3-1b | -----.....----                                         | 320 |
| Glu-B3-1a | -----a-----.....----                                   | 341 |
| Glu-B3-1b | -----a-----.....----                                   | 341 |
| Glu-B3-1c | -----a-----.....----                                   | 341 |
| Glu-D3-1a | c-----a-----tgg-a-----aacctg-----                      | 376 |
| Glu-D3-1b | c-----a-----tgg-a-----aacctg-----                      | 376 |
| Glu-D3-1c | c-----a-----tgg-a-----aacctg-----                      | 376 |
| Glu-A3-1a | TGGAGTAGATGATGGCACGGATTGCTTCATAGCGGGATTGTTCCGGGGATTTGC | 373 |
| Glu-A3-1b | -----                                                  | 373 |
| Glu-B3-1a | -----c-----c--g-----                                   | 394 |
| Glu-B3-1b | -----c-----c--g-----                                   | 394 |
| Glu-B3-1c | -----c-----c--g-----                                   | 394 |
| Glu-D3-1a | -----a-----c-----c-g-----                              | 429 |
| Glu-D3-1b | -----a-----c-----c-g-----                              | 429 |
| Glu-D3-1c | -----a-----c-----c-g-----                              | 429 |
| Glu-A3-1a | TGCAATTGCTGGCAACATTGTTGTTGCATCACATGGCAACTGCTCTGCTGCCA  | 426 |
| Glu-A3-1b | -----g-----                                            | 426 |
| Glu-B3-1a | g--gc--t-----a----t-----                               | 447 |
| Glu-B3-1b | g--gc--t-----a----t-----                               | 447 |
| Glu-B3-1c | g--gc--t-----a----t-----                               | 447 |

|           |                                                        |     |
|-----------|--------------------------------------------------------|-----|
| Glu-D3-1a | g---c-----g-----a-                                     | 482 |
| Glu-D3-1b | g---c-----a-                                           | 482 |
| Glu-D3-1c | g---c-----a-                                           | 482 |
| Glu-A3-1a | CATCTGTGACCTAGCAAGACGTTGTGGCATTGCTACAGGGCTGCACTGCTGCT  | 479 |
| Glu-A3-1b | -----                                                  | 479 |
| Glu-B3-1a | ---t---g-----c-a-----c-----a-----                      | 500 |
| Glu-B3-1b | ---t-----c-a-----c---t---a-----t-                      | 500 |
| Glu-B3-1c | ---t-----c-a-----c---t---a-----t-                      | 500 |
| Glu-D3-1a | ---t--c-----c-----                                     | 535 |
| Glu-D3-1b | ---t--c-----c-----                                     | 535 |
| Glu-D3-1c | ---t--c-----c-----                                     | 535 |
| Glu-A3-1a | GGAGGAATACTTTGCATGGGTTTAACTGCTGCAAAAACGGATGGCTGAACAATA | 532 |
| Glu-A3-1b | ----g-----g-----                                       | 532 |
| Glu-B3-1a | -----c-----g-----g---a---a---t--ct                     | 553 |
| Glu-B3-1b | -----c--c-----g-----t-----c-                           | 553 |
| Glu-B3-1c | -----c--c-----g-----t-----c-                           | 553 |
| Glu-D3-1a | -----c-----g-----t--t-----c-                           | 588 |
| Glu-D3-1b | -----c-----c--g-----t-----c-                           | 588 |
| Glu-D3-1c | --g-----gc-----g-----t-----c-                          | 588 |
| Glu-A3-1a | GGGATTTGCTGTTG.....                                    | 546 |
| Glu-A3-1b | -----                                                  | 546 |
| Glu-B3-1a | --t----t----ctgtgaaaatggtggttgttgttgcgcgaaaatggtgg     | 606 |
| Glu-B3-1b | -----t----...tggaaactgt...tgggtgttgttgtggaaaaggtgg     | 600 |
| Glu-B3-1c | -----t----...tggaaactgt...tgggtgttgttgtggaaaaggtgg     | 600 |
| Glu-D3-1a | -----t----.....                                        | 602 |
| Glu-D3-1b | -----t----.....                                        | 602 |
| Glu-D3-1c | -----t----.....                                        | 602 |
| Glu-A3-1a | .....CACAAAGTTGTTGTTGTTGT.                             | 565 |
| Glu-A3-1b | .....-----c---                                         | 565 |
| Glu-B3-1a | ctgttgctgctgtgaaattggtggttgttgtgaa-acg--g-----g        | 659 |
| Glu-B3-1b | ttgttgtgaagatggttgttgcctgctgcgaaaatggtg-----g          | 653 |
| Glu-B3-1c | ttgttgtgaagatggttgttgcctgctgcgaaaatggtg-----g          | 653 |
| Glu-D3-1a | .....caccagctggtggttgtt-----g-aa                       | 637 |
| Glu-D3-1b | .....caccagctggtggttgtt-----g-aa                       | 637 |
| Glu-D3-1c | .....caccagctggtggttgtt-----...--g-aa                  | 634 |
| Glu-A3-1a | .....TGTTGTGGAGGTAAAACTAGTTGTTGTTGCTGCGAAAATGGTGAT     | 610 |
| Glu-A3-1b | .....-----a-----                                       | 610 |
| Glu-B3-1a | taaatggt-----t--t--tgttg-t-----c-----t---t---g-        | 712 |
| Glu-B3-1b | aaaatggtg-----t-t---g---g-----g-                       | 706 |

|           |                                                        |     |
|-----------|--------------------------------------------------------|-----|
| Glu-B3-1c | aaaatggtg-----t-t---g---g-----g-                       | 706 |
| Glu-D3-1a | aaggtgat-----g-----t-----g-                            | 690 |
| Glu-D3-1b | aaggtgat-----g-----t-----g-                            | 690 |
| Glu-D3-1c | aaggtgat-----g-----t-----g-                            | 686 |
|           |                                                        |     |
| Glu-A3-1a | TGTTGC.....G.....GTAG                                  | 621 |
| Glu-A3-1b | -----f-----                                            | 621 |
| Glu-B3-1a | ----tgaaaacggtggtt-ttggtg...tgtaaatggttgttgttgtt--t-   | 762 |
| Glu-B3-1b | ----ttggttgttgttgtt-ttg.....tgaaaatggtggttgttgtg----   | 753 |
| Glu-B3-1c | ----ttggttgttgttgtt-ttggttgttgtgaaaatggtggttgttgtg---- | 759 |
| Glu-D3-1a | ----ggtagaactagtt-ttg.....ttgct-cga                    | 722 |
| Glu-D3-1b | ----ggtagaactagtt-ttg.....ttgct-cga                    | 722 |
| Glu-D3-1c | ----ggtagaactagtt-ttg.....ttgct-cga                    | 718 |
|           |                                                        |     |
| Glu-A3-1a | AACTGGTTGTTGTTGCTGTGAAAAATGGTGGTTGCTGCGATAGAAT...TGGTT | 671 |
| Glu-A3-1b | -----...-----                                          | 671 |
| Glu-B3-1a | ttg-t-----c-----t---ag--t---aac-----                   | 815 |
| Glu-B3-1b | -----c-----t---ag--t---aac-----                        | 806 |
| Glu-B3-1c | -----c-----t---ag--t---aac-----                        | 812 |
| Glu-D3-1a | --a---g---...---gt-gaat-----t---tgaga--atgg-----       | 772 |
| Glu-D3-1b | --a---g---...---gt-gaat-----t---tgaga--atgg-----       | 772 |
| Glu-D3-1c | --a---g---t..---gt-gaat-----t---tgaga--atgg-----       | 769 |
|           |                                                        |     |
| Glu-A3-1a | GTTGCTGCGA...AAATGGTGGTTGTTGCTGCGAAAAATGATGGTTGTTGAGGT | 721 |
| Glu-A3-1b | -----...-----                                          | 721 |
| Glu-B3-1a | -c--t---gcag--c---t-----g--a-----ca--                  | 868 |
| Glu-B3-1b | -c--t---gcag--c---t-----g--a-----ca--                  | 859 |
| Glu-B3-1c | -c--t---gcag--c---t-----g--a-----ca--                  | 865 |
| Glu-D3-1a | -----c-...-----a                                       | 822 |
| Glu-D3-1b | -----c-...-----a                                       | 822 |
| Glu-D3-1c | -----c-...-----a                                       | 819 |
|           |                                                        |     |
| Glu-A3-1a | A..ATGGTTG.TTGTGTTGTT...GTGAAAAATGGTGGTTGTTG...TGAAAA  | 765 |
| Glu-A3-1b | -..-----...-----                                       | 765 |
| Glu-B3-1a | -ta--aa---g-----c-...---g-----t-----ctg---c-           | 918 |
| Glu-B3-1b | -ta--aa---g-----c-...---g-----t-----ctg---c-           | 909 |
| Glu-B3-1c | -ta--aa---a-----c-...---g-----t-----ctg---c-           | 915 |
| Glu-D3-1a | -...-a---.-----ggt-----a-----...-g---                  | 869 |
| Glu-D3-1b | -...-a---.-----ggt-----a-----...-g---                  | 869 |
| Glu-D3-1c | -...-a---.-----...-----a-----...-ag---                 | 860 |
|           |                                                        |     |
| Glu-A3-1a | TGAC.....TGTTGTGGTGGTAATGGTTGCTGCTGCCATGGTCTCTCCAAAC   | 812 |
| Glu-A3-1b | -----                                                  | 812 |
| Glu-B3-1a | --gtggttgt-----t-----t-----                            | 971 |

|           |                                                       |      |
|-----------|-------------------------------------------------------|------|
| Glu-B3-1b | --gtggttgt-----t-----t-----                           | 962  |
| Glu-B3-1c | --gtggttgt-----t-----t-----                           | 968  |
| Glu-D3-1a | --t-.....-----                                        | 916  |
| Glu-D3-1b | --t-.....-----                                        | 916  |
| Glu-D3-1c | --t-.....-----                                        | 907  |
|           |                                                       |      |
| Glu-A3-1a | CAGAGATGCAGCTAGTCTCCATCTGTGCAATGGCACTTGTCGCCACAACGGCG | 865  |
| Glu-A3-1b | -----                                                 | 865  |
| Glu-B3-1a | ---g--c--g-----t-----c---g---t---a                    | 1024 |
| Glu-B3-1b | ---g--c--g-----t-----g---t---a                        | 1015 |
| Glu-B3-1c | ---g--c--g-----t-----g---t---a                        | 1021 |
| Glu-D3-1a | ---g-----t-----c---t-----g-----                       | 969  |
| Glu-D3-1b | ---g-----t-----c---t-----g-----t-                     | 969  |
| Glu-D3-1c | ---g-----t-----c---t-----g-----                       | 960  |
|           |                                                       |      |
| Glu-A3-1a | ATGAGGGCAAAGACGAGGAAGATCTTCATGATGGATTGGTGCTAACTACTTTT | 918  |
| Glu-A3-1b | -----g-----                                           | 918  |
| Glu-B3-1a | -g---a-----t-----g-----g-----t-----g-a--              | 1077 |
| Glu-B3-1b | -g---a-----t-----g-----g-----t-----g-a--              | 1068 |
| Glu-B3-1c | -g---a-----t-----g-----g-----t-----g-a--              | 1074 |
| Glu-D3-1a | -g-----g-----g-----t-----g-g--                        | 1022 |
| Glu-D3-1b | -g-----g-----g-----t-----g-g--                        | 1022 |
| Glu-D3-1c | -g-----g-----g-----t-----g-g--                        | 1013 |
|           |                                                       |      |
| Glu-A3-1a | GCTTGGTTTTGATGCTTGTGCTTGTGATGATCATTATACTTCATGCCTATTTA | 971  |
| Glu-A3-1b | -----                                                 | 971  |
| Glu-B3-1a | -----a-----c-----t-g-----                             | 1130 |
| Glu-B3-1b | -----a-----c-----t-g-----                             | 1121 |
| Glu-B3-1c | -----a-----c-----t-g-----                             | 1127 |
| Glu-D3-1a | -----c-----t-----                                     | 1075 |
| Glu-D3-1b | -----c-----t-----                                     | 1075 |
| Glu-D3-1c | -----c-----t-c-----                                   | 1066 |
|           |                                                       |      |
| Glu-A3-1a | TAGTAGTCCGGGCACCACCTCTTT.CCTTCTTTGCATCAACTTAAATAATTCT | 1023 |
| Glu-A3-1b | -----.                                                | 1023 |
| Glu-B3-1a | -----c-----t-----c---g---t-----a-                     | 1182 |
| Glu-B3-1b | -----c-----t-----c---g---t-----a-                     | 1173 |
| Glu-B3-1c | ----ac-----gt-----c---g---t-----a-                    | 1179 |
| Glu-D3-1a | -----c-----t-----c---g---t-----a-                     | 1127 |
| Glu-D3-1b | -----c-a-a-----t-----g---t-----                       | 1128 |
| Glu-D3-1c | -----c-a-a-----t-----g---t-----                       | 1119 |
|           |                                                       |      |
| Glu-A3-1a | ATTTGGATGCATCAGAAATGATTT..TTTGGTACATTGTGTTAGGTT.GCACA | 1073 |
| Glu-A3-1b | -----.                                                | 1073 |

|           |                                                        |        |      |
|-----------|--------------------------------------------------------|--------|------|
| Glu-B3-1a | g-----tt--t-----ga--..-----                            | .----t | 1232 |
| Glu-B3-1b | g-----tt--t-----ga--..-----                            | .----t | 1223 |
| Glu-B3-1c | g-----tt--t-----ga--..-----                            | .----t | 1229 |
| Glu-D3-1a | g-----tt--t-----ga--..-----                            | .----t | 1177 |
| Glu-D3-1b | g----c-c---t-----a--at---t-----g-----t---t             |        | 1181 |
| Glu-D3-1c | g----c-c---t-----a--at---t-----t-----t---t             |        | 1172 |
|           |                                                        |        |      |
| Glu-A3-1a | AGCTACAAAAGCGTAC.....                                  |        | 1089 |
| Glu-A3-1b | -----                                                  |        | 1089 |
| Glu-B3-1a | -----gc-tacttttggat....tgatcatcaaagttgcttttttagttgt    |        | 1281 |
| Glu-B3-1b | -----gc-tacttttggat....tgatcatcaaagttgcttttttagttgt    |        | 1272 |
| Glu-B3-1c | -----gc-tacttttggat....tgatcatcaaagttgcttttttagttgt    |        | 1278 |
| Glu-D3-1a | -----gc-tacttttggat....tgatcatcaaagttgcttttttagttgt    |        | 1226 |
| Glu-D3-1b | -----gc-tacttttggatataattgatcatcaaagttgatttttagttgt    |        | 1234 |
| Glu-D3-1c | -----gc-tacttttggatataattgatcatcaaagttgatttttagttgt    |        | 1225 |
|           |                                                        |        |      |
| Glu-A3-1a | .....                                                  |        | 1089 |
| Glu-A3-1b | .....                                                  |        | 1089 |
| Glu-B3-1a | gcatatgattatacacaaagtatagaaatcctaaagtttgctatagatgaatc  |        | 1334 |
| Glu-B3-1b | gcatatgattatacacaaagtatagaaatcctaaagtttgctatagatgaatc  |        | 1325 |
| Glu-B3-1c | gcatatgattatacacaaagtatagaaatcctaaagtttgctatagatgaatc  |        | 1331 |
| Glu-D3-1a | gcatatgattatacacaaagtatagaaatcctaaagtttgctatagatgaatc  |        | 1279 |
| Glu-D3-1b | gcatacgatcacacacaaagtacagaaaccccgatatttgctatataatgactc |        | 1287 |
| Glu-D3-1c | gcatacgatcacacacaaagtacagaaaccccgatatttgctatataatgactc |        | 1278 |
|           |                                                        |        |      |
| Glu-A3-1a | .....                                                  |        | 1089 |
| Glu-A3-1b | .....                                                  |        | 1089 |
| Glu-B3-1a | accttattcactttacatgtcatgcacttctcagga.....              |        | 1370 |
| Glu-B3-1b | accttattcactttacatgtcatgcacttctcagga.....              |        | 1361 |
| Glu-B3-1c | accttattcactttacatgtcatgcacttctcagga.....              |        | 1367 |
| Glu-D3-1a | accttattcactttacatgtcacgcacttatcaggatagtatcacttttgcaa  |        | 1332 |
| Glu-D3-1b | accttattaactttacatgtcacacacttatcaagatagtatcacttttacia  |        | 1340 |
| Glu-D3-1c | accttattaactttacatgtcacacacttatcaagatagtatcacttttacia  |        | 1331 |
|           |                                                        |        |      |
| Glu-A3-1a | .....                                                  |        | 1089 |
| Glu-A3-1b | .....                                                  |        | 1089 |
| Glu-B3-1a | .....                                                  |        | 1370 |
| Glu-B3-1b | .....                                                  |        | 1361 |
| Glu-B3-1c | .....                                                  |        | 1367 |
| Glu-D3-1a | ccgagtttggaaccttgataggctgtcagccattaacaagaagacgaaact    |        | 1385 |
| Glu-D3-1b | ccgagtttggaaccttgataggctgtcagccgtaacaagaaggcaaaact     |        | 1393 |
| Glu-D3-1c | ccgagtttggaaccttgataggctgtcagccgtaacaagaaggcaaaact     |        | 1384 |
|           |                                                        |        |      |
| Glu-A3-1a | .....                                                  |        | 1089 |

|           |                                                           |      |
|-----------|-----------------------------------------------------------|------|
| Glu-A3-1b | .....                                                     | 1089 |
| Glu-B3-1a | .....                                                     | 1370 |
| Glu-B3-1b | .....                                                     | 1361 |
| Glu-B3-1c | .....                                                     | 1367 |
| Glu-D3-1a | tgtgtggaaccaagtc.gcaatcgtgtctcggctattaagatatgctaaagcc     | 1437 |
| Glu-D3-1b | tgtgtatgactaagtttgcaatcatgtgtgggctgtaggatatgctcgatta      | 1446 |
| Glu-D3-1c | tgtgtatgactaagtttgcaatcatgtgtgggctgtaggatatgctcgatta      | 1437 |
|           |                                                           |      |
| Glu-A3-1a | .....                                                     | 1089 |
| Glu-A3-1b | .....                                                     | 1089 |
| Glu-B3-1a | .....                                                     | 1370 |
| Glu-B3-1b | .....                                                     | 1361 |
| Glu-B3-1c | .....                                                     | 1367 |
| Glu-D3-1a | ttgc.gtgtcagaggt..acggttcttctaggctcggttgcttttcgaaaaac     | 1487 |
| Glu-D3-1b | gtaaagccttgagtgtggagtggttcttctatatattcggttgcttttcagaaaaac | 1499 |
| Glu-D3-1c | gtaaagccttgagtgtggagtggttcttctatatattcggttgcttttcagaaaaac | 1490 |
|           |                                                           |      |
| Glu-A3-1a | .....                                                     | 1089 |
| Glu-A3-1b | .....                                                     | 1089 |
| Glu-B3-1a | .....                                                     | 1370 |
| Glu-B3-1b | .....                                                     | 1361 |
| Glu-B3-1c | .....                                                     | 1367 |
| Glu-D3-1a | taactttgtattttctcctaaggtaataagatgaaactgacgcctatagagcat    | 1540 |
| Glu-D3-1b | taactttgtacttttctgtaagatgataagatgaaactgacgtctatagagcat    | 1552 |
| Glu-D3-1c | taactttgtacttttctgtaagatgataaactgacgtctatagagcat          | 1543 |
|           |                                                           |      |
| Glu-A3-1a | .....                                                     | 1089 |
| Glu-A3-1b | .....                                                     | 1089 |
| Glu-B3-1a | .....                                                     | 1370 |
| Glu-B3-1b | .....                                                     | 1361 |
| Glu-B3-1c | .....                                                     | 1367 |
| Glu-D3-1a | gacatgactcatcaaactcctctttacatgtaaaggatggcagtttctacaa      | 1591 |
| Glu-D3-1b | gacatgactcatcgaatccggttttacatgtaaaggatggcagtttctacaa      | 1603 |
| Glu-D3-1c | gacatgactcatcgaatccgcttttacatgtaaaggatggcagtttctacaa      | 1594 |

**FIGURE S1:** Alignments of the 8 LMW-GS genes nucleotide sequences. Dashes and dots indicate the same sequences and deletions, respectively.

|           |                                                      |     |
|-----------|------------------------------------------------------|-----|
| Glu-A3-1a | MKIFLVFALIAVVATSIAIAQMETSCLISGLERPWQQQLPQQS.....     | 43  |
| Glu-A3-1b | --t-----                                             | 43  |
| Glu-B3-1a | --t--i---l-ia-a-----rvp---k-----qppcsqqqqp           | 52  |
| Glu-B3-1b | --t--i---l-ia-----rvp---k-----qppcsqqqqp             | 52  |
| Glu-B3-1c | --t--i---l-ia-----rvp---k-----qppcsqqqqp             | 52  |
| Glu-D3-1a | --t-----l--a-----r--p-----t.....                     | 43  |
| Glu-D3-1b | --t-----lt-a-----r--p-----t.....                     | 43  |
| Glu-D3-1c | --t-----l--a-----r--p-----t.....                     | 43  |
|           |                                                      |     |
| Glu-A3-1a | .....FSQQPPFSQQQQQ.PLPQQ.....PSFSQQQ.....PP          | 70  |
| Glu-A3-1b | .....-----                                           | 70  |
| Glu-B3-1a | fpqqqqpiiiil--s-----p.v---qpviilqq-p----qqqqqqqq-    | 103 |
| Glu-B3-1b | fpqqqqpiiiil--s-----p.v---qpviilqq-p----qpvlpqq--    | 103 |
| Glu-B3-1c | fpqqqqsiiiiil--s-----p.v---qpviilqq-p----qpvlpqq--   | 103 |
| Glu-D3-1a | .....-p---l-----qlf---.....-ppfwqqq--                | 78  |
| Glu-D3-1b | .....-p---l-----qlf---.....-ppfwqqq--                | 78  |
| Glu-D3-1c | .....-l---l-----..lf---.....-ppfwqqq--               | 76  |
|           |                                                      |     |
| Glu-A3-1a | FSQQQPILSQQ.PPFSQQQQFVLPQQSPFSQQQLVLPQQ.....Q.....   | 110 |
| Glu-A3-1b | -----l-----                                          | 110 |
| Glu-B3-1a | -t---pf---.---i-----qqqq--q--t---.ppfsq-ppisqq-qppfs | 153 |
| Glu-B3-1b | ----qqqq-..-----p-----ppfsq-qqpssq-.ppfp             | 152 |
| Glu-B3-1c | ----qqqq--q-----p-----ppfsq-qqpssq-.ppfp             | 154 |
| Glu-D3-1a | -----p--.-----l----p-----p----qspfpq-.....           | 124 |
| Glu-D3-1b | -----p--.-----l----p-----p----qspfpq-.....           | 124 |
| Glu-D3-1c | -----p--.ttifaatttsstattti----p----qspfpq-.....      | 122 |
|           |                                                      |     |
| Glu-A3-1a | QQ..QQLVQQQ.IPIVQPSVLQQLNPCKVFLQQQCSPVAMPQRLARSQMWQQ | 159 |
| Glu-A3-1b | --..-----s-----                                      | 159 |
| Glu-B3-1a | --qqt pfs---q--vih-----i---s---p-----                | 205 |
| Glu-B3-1b | --hq-.fp---.---v-----h---s-----                      | 202 |
| Glu-B3-1c | --hq-.fp---.---v-----h---s-----                      | 204 |
| Glu-D3-1a | --qh-----.-v---im-----l--                            | 175 |
| Glu-D3-1b | --qh-----.-v---i---d-----l--                         | 175 |
| Glu-D3-1c | --.h-----.-v---i-----l-p-----l--                     | 172 |
|           |                                                      |     |
| Glu-A3-1a | SSCHVMQQQCCQQLQQIPEQSRYEAIRAIYSIILQEQQ..QGFVQPQQQQP  | 209 |
| Glu-A3-1b | -----                                                | 209 |
| Glu-B3-1a | -----p-----s-----v-----                              | 255 |
| Glu-B3-1b | -----p-----s-----v-----                              | 252 |
| Glu-B3-1c | -----p-----s-----v-----                              | 254 |
| Glu-D3-1a | ----a-----p--q-----qv--si-s-----                     | 227 |
| Glu-D3-1b | -----p--q-----qv--si-s-----                          | 227 |
| Glu-D3-1c | -----p--q-----qv--si-s-----                          | 224 |



|           |                                                      |     |
|-----------|------------------------------------------------------|-----|
| Glu-A3-1a | QQSGQGVSQSQQQSQQQ..LGQCSFQQPQ..QQLGQQPQQQQQQVLQGTFLQ | 257 |
| Glu-A3-1b | -----..-----                                         | 257 |
| Glu-B3-1a | -----h-----qq-----ql-----..ip--i---                  | 305 |
| Glu-B3-1b | -----h-----qq-----ql-----..ip--i---                  | 302 |
| Glu-B3-1c | -----h-----qq-----ql-----..ip--i---                  | 304 |
| Glu-D3-1a | --l--c--p-----.....-----..la-----                    | 261 |
| Glu-D3-1b | --l--c--p-----.....-----..la-----                    | 261 |
| Glu-D3-1c | --l--c--p-----.....-----..lv-----                    | 258 |
|           |                                                      |     |
| Glu-A3-1a | PHQIAHLEAVTSIALRTLPTMCSVNVPLYSATTSVPLGVGI.....       | 298 |
| Glu-A3-1b | -----i-----.....                                     | 298 |
| Glu-B3-1a | ----sq--vm-----c-----g-----s--im-fsi-tgvgay          | 351 |
| Glu-B3-1b | ----sq--vm-----g-----s--imsfsi-tgvgay                | 348 |
| Glu-B3-1c | ----sq--vm-----g-----s--im-fsi-tgvgay                | 350 |
| Glu-D3-1a | ----q--vm-----i-----rt----f---tgvgay                 | 307 |
| Glu-D3-1b | ----q--vm-----i-----rt----f---tgvgay                 | 307 |
| Glu-D3-1c | ----q--vm-----i-----rt----fd--tgvgay                 | 304 |

**FIGURE S2:** Multiple alignments of the deduced amino acid sequences of eight cloned genes in the study. The same sequences and deletions indicated by dashes and dots, respectively.
